# Supplementary material
Source: PubMed Central journal article supplement (PMC9232951)
Supplement: NIHMS1795333-supplement-1.pdf [file NIHMS1795333-supplement-1.pdf]

**Appendix**  
**Dual Use of Nicotine and Cannabis Through Vaping Among Adolescents**  
**Moustafa et al.**

**Appendix Table 1.** Distribution of Repeated Measures of Nicotine and Cannabis Vaping Across 7 Waves for Each of the 4 Latent Classes

| <b>Substance/Class/Vaping status</b> | <b>Wave 1<br/>N (%)</b> | <b>Wave 2<br/>N (%)</b> | <b>Wave 3<br/>N (%)</b> | <b>Wave 4<br/>N (%)</b> | <b>Wave 5<br/>N (%)</b> | <b>Wave 6<br/>N (%)</b> | <b>Wave 7<br/>N (%)</b> |
|--------------------------------------|-------------------------|-------------------------|-------------------------|-------------------------|-------------------------|-------------------------|-------------------------|
| <b>Nicotine</b>                      |                         |                         |                         |                         |                         |                         |                         |
| <b>1</b>                             |                         |                         |                         |                         |                         |                         |                         |
| Never                                | 96 (37.1)               | 125 (48.3)              | 109 (42.1)              | 148 (57.1)              | 194 (74.9)              | 225 (86.9)              | 228 (88.0)              |
| Ever                                 | 64 (24.7)               | 67 (25.9)               | 95 (36.7)               | 60 (23.2)               | 16 (6.2)                | 13 (5.0)                | 15 (5.8)                |
| 6 months                             | 30 (11.6)               | 24 (9.3)                | 9 (3.5)                 | 10 (3.9)                | 15 (5.8)                | 8 (3.1)                 | 7 (2.7)                 |
| 30 days                              | 69 (26.6)               | 43 (16.6)               | 46 (17.8)               | 41 (15.8)               | 34 (13.1)               | 13 (5.0)                | 9 (3.5)                 |
| Total                                | 259 (100.0)             | 259 (100.0)             | 259 (100.0)             | 259 (100.0)             | 259 (100.0)             | 259 (100.0)             | 259 (100.0)             |
| <b>2</b>                             |                         |                         |                         |                         |                         |                         |                         |
| Never                                | 74 (57.8)               | 71 (55.5)               | 37 (28.9)               | 18 (14.1)               | 24 (18.8)               | 15 (11.7)               | 22 (17.2)               |
| Ever                                 | 15 (11.7)               | 22 (17.2)               | 31 (24.2)               | 22 (17.2)               | 10 (7.8)                | 8 (6.3)                 | 9 (7.0)                 |
| 6 months                             | 14 (10.9)               | 15 (11.7)               | 10 (7.8)                | 12 (9.4)                | 11 (8.6)                | 13 (10.2)               | 12 (9.4)                |
| 30 days                              | 25 (19.5)               | 20 (15.6)               | 50 (39.1)               | 76 (59.4)               | 83 (64.8)               | 92 (71.9)               | 85 (66.4)               |
| Total                                | 128 (100.0)             | 128 (100.0)             | 128 (100.0)             | 128 (100.0)             | 128 (100.0)             | 128 (100.0)             | 128 (100.0)             |
| <b>3</b>                             |                         |                         |                         |                         |                         |                         |                         |
| Never                                | 278 (88.8)              | 284 (90.7)              | 264 (84.3)              | 225 (71.9)              | 189 (60.4)              | 167 (53.4)              | 149 (47.6)              |
| Ever                                 | 20 (6.4)                | 13 (4.2)                | 25 (8.0)                | 27 (8.6)                | 24 (7.7)                | 41 (13.1)               | 48 (15.3)               |
| 6 months                             | 12 (3.8)                | 10 (3.2)                | 9 (2.9)                 | 28 (8.9)                | 46 (14.7)               | 39 (12.5)               | 42 (13.4)               |
| 30 days                              | 3 (1.0)                 | 6 (1.9)                 | 15 (4.8)                | 33 (10.5)               | 54 (17.3)               | 66 (21.1)               | 74 (23.6)               |
| Total                                | 313 (100.0)             | 313 (100.0)             | 313 (100.0)             | 313 (100.0)             | 313 (100.0)             | 313 (100.0)             | 313 (100.0)             |
| <b>4</b>                             |                         |                         |                         |                         |                         |                         |                         |
| Never                                | 1,099<br>(96.4)         | 1,127<br>(98.9)         | 1,125<br>(98.7)         | 1,121<br>(98.3)         | 1,134<br>(99.5)         | 1,131<br>(99.2)         | 1,122<br>(98.4)         |
| Ever                                 | 16 (1.4)                | 7 (0.6)                 | 9 (0.8)                 | 10 (0.9)                | 1 (0.1)                 | 2 (0.2)                 | 6 (0.5)                 |
| 6 months                             | 19 (1.7)                | 3 (0.3)                 | 1 (0.1)                 | 3 (0.3)                 | 1 (0.1)                 | 5 (0.4)                 | 7 (0.6)                 |
| 30 days                              | 6 (0.5)                 | 3 (0.3)                 | 5 (0.4)                 | 6 (0.5)                 | 4 (0.4)                 | 2 (0.2)                 | 5 (0.4)                 |
| Total                                | 1,140<br>(100.0)        |
| <b>Cannabis</b>                      |                         |                         |                         |                         |                         |                         |                         |
| <b>1</b>                             |                         |                         |                         |                         |                         |                         |                         |

**Appendix**  
**Dual Use of Nicotine and Cannabis Through Vaping Among Adolescents**  
**Moustafa et al.**

|         |                  |                  |                  |                  |                  |                  |                  |
|---------|------------------|------------------|------------------|------------------|------------------|------------------|------------------|
| Never   | 99 (38.2)        | 55 (21.2)        | 42 (16.2)        | 41 (15.8)        | 56 (21.6)        | 84 (32.4)        | 88 (34.0)        |
| Ever    | 109 (42.1)       | 166 (64.1)       | 171 (66.0)       | 171 (66.0)       | 171 (66.0)       | 153 (59.1)       | 160 (61.8)       |
| 30 days | 51 (19.7)        | 38 (14.7)        | 46 (17.8)        | 47 (18.1)        | 32 (12.4)        | 22 (8.5)         | 11 (4.2)         |
| Total   | 259 (100.0)      | 259 (100.0)      | 259 (100.0)      | 259 (100.0)      | 259 (100.0)      | 259 (100.0)      | 259 (100.0)      |
| 2       |                  |                  |                  |                  |                  |                  |                  |
| Never   | 96 (75.0)        | 80 (62.5)        | 40 (31.3)        | 14 (10.9)        | 3 (2.3)          | 3 (2.3)          | 6 (4.7)          |
| Ever    | 22 (17.2)        | 34 (26.6)        | 43 (33.6)        | 50 (39.1)        | 35 (27.3)        | 36 (28.1)        | 43 (33.6)        |
| 30 days | 10 (7.8)         | 14 (10.9)        | 45 (35.2)        | 64 (50.0)        | 90 (70.3)        | 89 (69.5)        | 79 (61.7)        |
| Total   | 128 (100.0)      | 128 (100.0)      | 128 (100.0)      | 128 (100.0)      | 128 (100.0)      | 128 (100.0)      | 128 (100.0)      |
| 3       |                  |                  |                  |                  |                  |                  |                  |
| Never   | 313 (100.0)      | 313 (100.0)      | 309 (98.7)       | 261 (83.4)       | 181 (57.8)       | 122 (39.0)       | 58 (18.5)        |
| Ever    | 0 (0)            | 0 (0)            | 4 (1.3)          | 26 (8.3)         | 80 (25.6)        | 121 (38.7)       | 184 (58.8)       |
| 30 days | 0 (0)            | 0 (0)            | 0 (0)            | 26 (8.3)         | 52 (16.6)        | 70 (22.4)        | 71 (22.7)        |
| Total   | 313 (100.0)      | 313 (100.0)      | 313 (100.0)      | 313 (100.0)      | 313 (100.0)      | 313 (100.0)      | 313 (100.0)      |
| 4       |                  |                  |                  |                  |                  |                  |                  |
| Never   | 1,132<br>(99.3)  | 1,139<br>(99.9)  | 1,140<br>(100.0) | 1,140<br>(100.0) | 1,140<br>(100.0) | 1,140<br>(100.0) | 1,140<br>(100.0) |
| Ever    | 4 (0.4)          | 1 (0.1)          | 0 (0)            | 0 (0)            | 0 (0)            | 0 (0)            | 0 (0)            |
| 30 days | 4 (0.4)          | 0 (0)            | 0 (0)            | 0 (0)            | 0 (0)            | 0 (0)            | 0 (0)            |
| Total   | 1,140<br>(100.0) |

**Appendix**  
**Dual Use of Nicotine and Cannabis Through Vaping Among Adolescents**  
**Moustafa et al.**

**Appendix Table 2.** Multinomial Logistic Regression Analysis Comparing Class 1 and 2 to Class 3

| Covariates                        | B     | OR (95% CI)                 |
|-----------------------------------|-------|-----------------------------|
| Class 1 versus Class 3            |       |                             |
| Sex                               | -0.22 | 0.81 (0.56, 1.17)           |
| Black race                        | 0.65  | <b>1.91*</b> (1.13, 3.24)   |
| Other race                        | 0.37  | 1.45 (0.81, 2.61)           |
| Non-Hispanic                      | -0.63 | <b>0.53**</b> (0.35, 0.80)  |
| Peer e-cigarette use              | 0.13  | <b>1.14**</b> (1.04, 1.26)  |
| Household e-cigarette use         | -0.03 | 0.97 (0.59, 1.61)           |
| Depressive symptoms               | -0.01 | 0.99 (0.97, 1.01)           |
| Sensation seeking                 | -0.01 | 1.00 (0.97, 1.03)           |
| Combustible cigarette smoking     | 1.09  | <b>2.97**</b> (1.46, 6.04)  |
| Perceived e-cigarette benefits    | 0.01  | 1.00 (0.96, 1.04)           |
| Positive e-cigarette expectations | 0.11  | <b>1.12***</b> (1.07, 1.18) |
| Alcohol use                       | 0.43  | 1.54 (0.98, 2.40)           |
| Cigar use                         | 0.68  | 1.96 (0.84, 4.60)           |
| Class 2 versus Class 3            |       |                             |
| Sex                               | -0.32 | 0.73 (0.46, 1.15)           |
| Black race                        | 0.27  | 1.30 (0.65, 2.60)           |
| Other race                        | 0.17  | 1.19 (0.55, 2.57)           |
| Non-Hispanic                      | 0.46  | 1.59 (0.87, 2.89)           |
| Peer e-cigarette use              | 0.10  | 1.11 (0.99, 1.24)           |
| Household e-cigarette use         | -0.12 | 0.89 (0.48, 1.63)           |
| Depressive symptoms               | -0.01 | 0.99 (0.97, 1.01)           |
| Sensation seeking                 | 0.07  | <b>1.07***</b> (1.03, 1.11) |
| Combustible cigarette smoking     | 0.57  | 1.77 (0.76, 4.08)           |
| Perceived e-cigarette benefits    | -0.03 | 0.97 (0.92, 1.01)           |
| Positive e-cigarette expectations | 0.09  | <b>1.089**</b> (1.02, 1.16) |
| Alcohol use                       | 0.97  | <b>2.65***</b> (1.58, 4.43) |
| Cigar use                         | 1.00  | <b>2.73*</b> (1.10, 6.73)   |

*Notes:* Variable values are as follows: Sex (1=female), Race dummy coded with White as reference group (Black, 0=No 1=Yes; Other, 0=No 1=Yes), Ethnicity (0=Hispanic, 1=Non-Hispanic), Cigarette smoking (0=Never, 1=Ever), Alcohol use (past 6 months, 0=No 1=Yes), and Cigar smoking (past 6 months, 0=No 1=Yes). Boldface indicates statistical significance (\* $p < 0.05$ ; \*\* $p < 0.01$ ; \*\*\* $p < 0.0001$ ).
